# Supplementary figures and images for: Tet2 Regulates Osteoclast Differentiation by Interacting with Runx1 and Maintaining Genomic 5-Hydroxymethylcytosine (5hmC)
Source: PubMed Central journal article supplement — Genomics Proteomics Bioinformatics. 2018 Jun 13;16(3):172–86. doi: 10.1016/j.gpb.2018.04.005 (PMC6076382; doi:10.1016/j.gpb.2018.04.005), 2018-06-13

A Related to Figure 5B

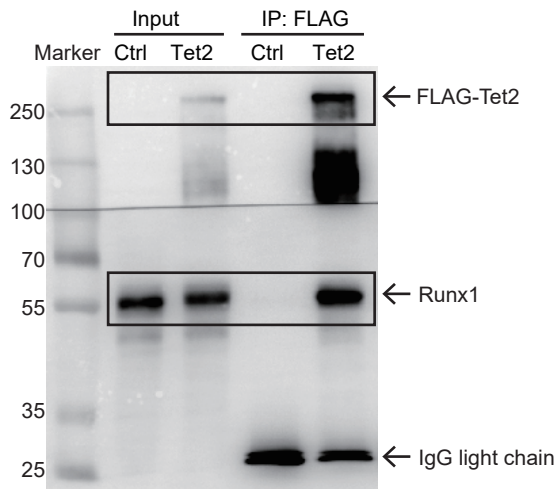

B Related to Figure 5C

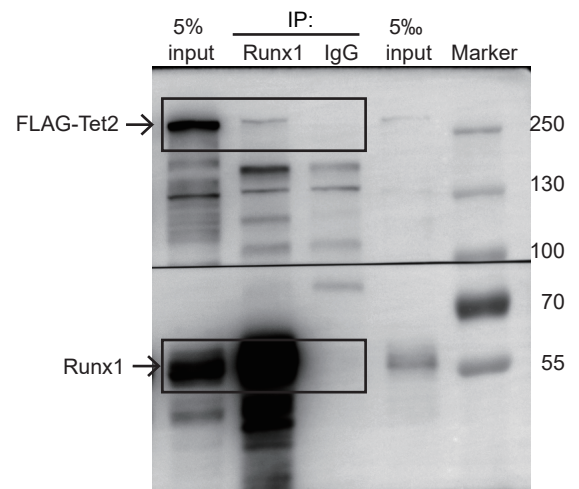

Supplement: mmc1.pdf [file mmc1.pdf]

**A** Ep300 target genes

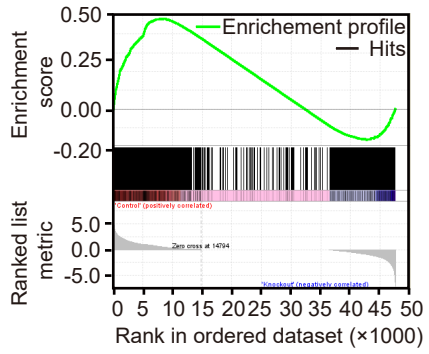

**C** Ep300 target genes

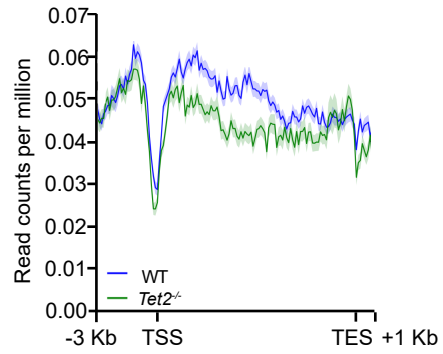

**B** Pu.1 target genes

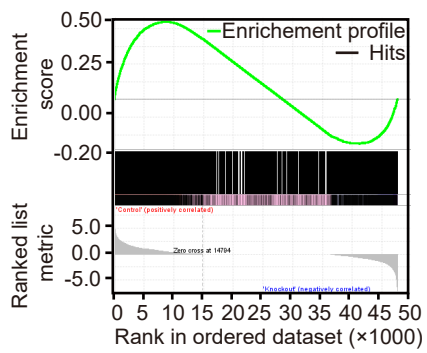

**D** Pu.1 target genes

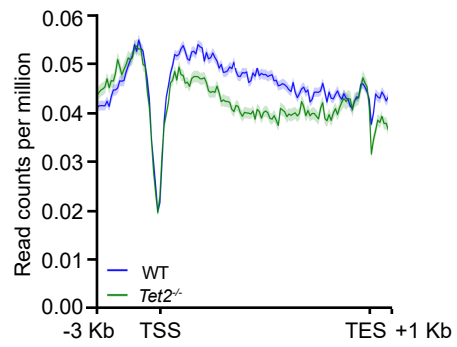

Supplement: mmc2.pdf [file mmc2.pdf]
